# Supplementary material for: JAM-A interacts with α3β1 integrin and tetraspanins CD151 and CD9 to regulate collective cell migration of polarized epithelial cells
Source: Cell Mol Life Sci. 2022 Jan 24;79(2):88. doi: 10.1007/s00018-022-04140-5 (PMC8784505; doi:10.1007/s00018-022-04140-5)
Supplement: Supplementary file 1 — Supplementary file1 (PDF 764 KB) [file 18_2022_4140_MOESM1_ESM.pdf]

## **Supplementary Information**

### **JAM-A interacts with $\alpha 3\beta 1$ integrin and tetraspanins CD151 and CD9 to regulate collective cell migration of polarized epithelial cells**

Cellular and Molecular Life Sciences

Sonja Thölmann, Jochen Seebach, Tetsuhisa Otani, Luise Florin, Hans Schnittler, Volker Gerke, Mikio Furuse, Klaus Ebnet\*

\*Author for correspondence

Klaus Ebnet, PhD, Institute-associated Research Group "Cell adhesion and cell polarity", Institute of Medical Biochemistry, ZMBE, University of Münster, Von-Esmarch-Str. 56, D-48149 Münster, Germany

e-mail: ebnetk@uni-muenster.de

Supplementary Figures S1 – S3

Supplementary Movie Legends

## Supplementary Figures

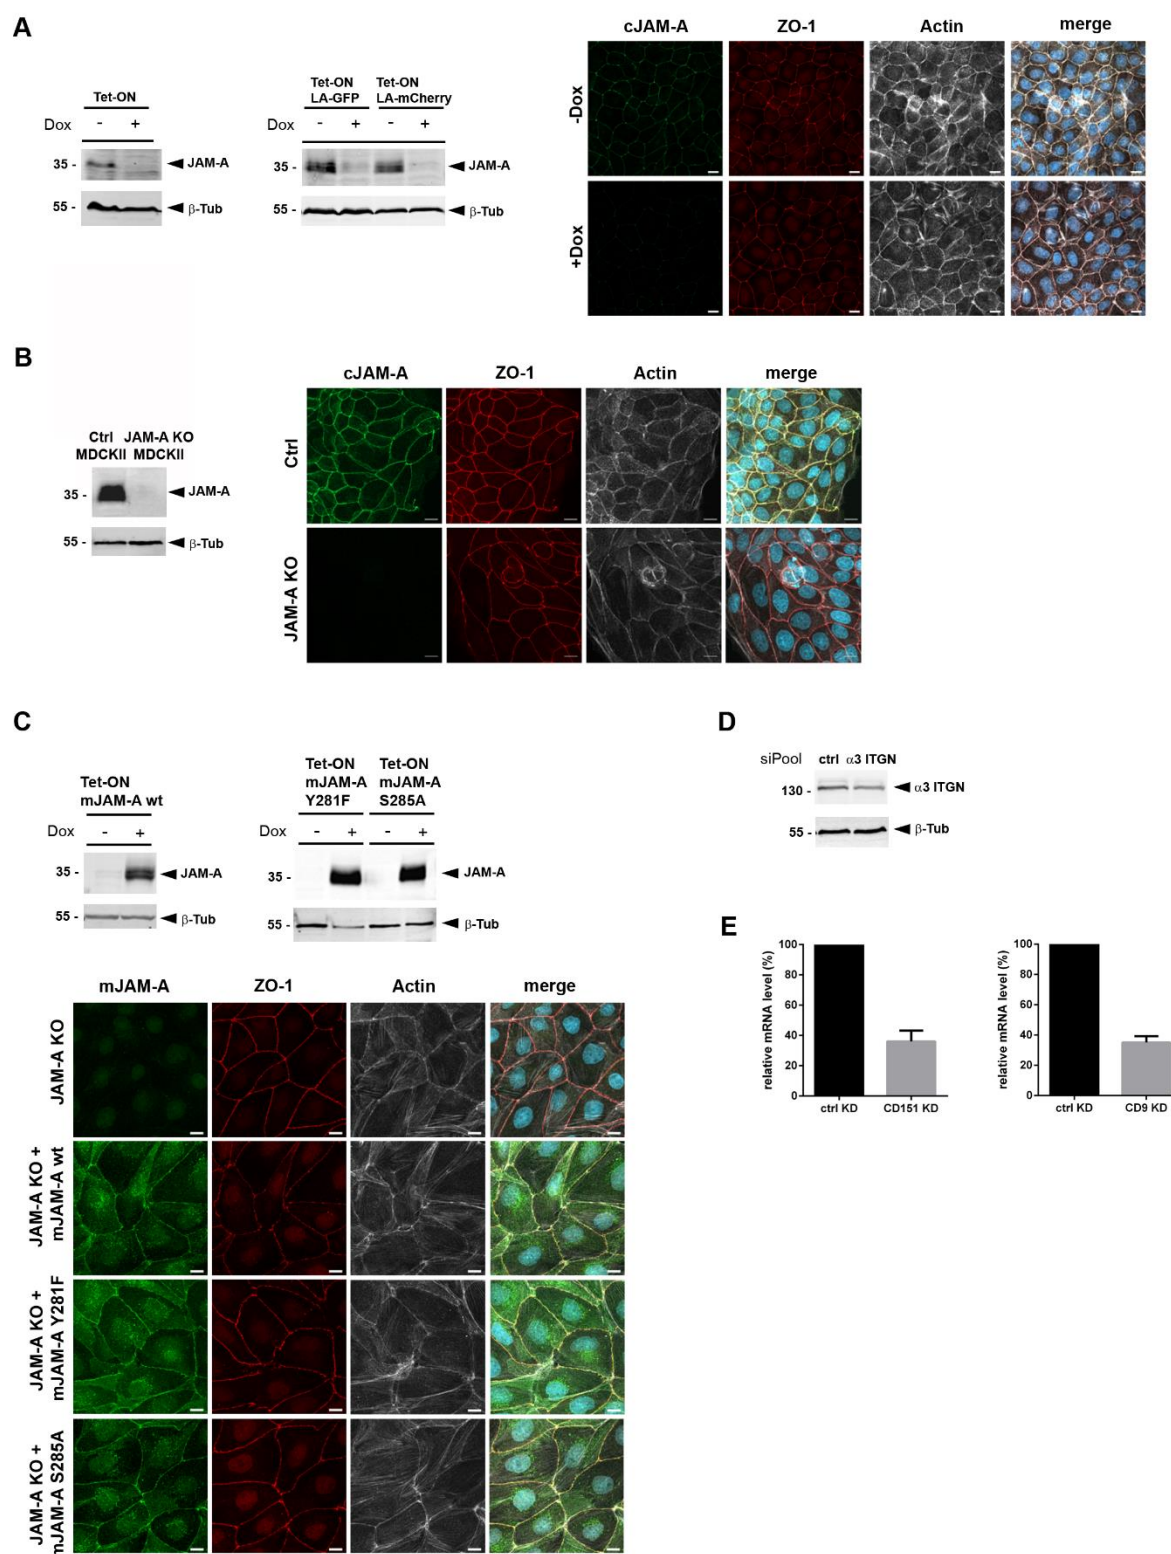

Suppl. Fig. S1: Analysis of knockdown efficiencies and characterization of JAM-A knockout MDCKII cells. (A) Knockdown efficiencies of JAM-A. Left: Western blot analysis of JAM-A in MDCKII

cells stably transfected with a conditional shRNA expression vector that expresses JAM-A shRNAs under a doxycycline-regulated promoter (pEmU6-proT, Tet-ON) without or with addition of doxycycline (-Dox or +Dox, respectively). Middle: Western blot analysis of JAM-A expression in pEmU6-proT/JAM-A shRNA-transfected MDCKII cells stably transfected with LA-EGFP or LA-mCherry without or with addition of doxycycline (-Dox or +Dox, respectively). Right: IF analysis JAM-A expression in pEmU6-proT/JAM-A shRNA-transfected MDCKII cells. Cells were stained for JAM-A, ZO-1 and F-Actin as indicated. Scale bars: 10  $\mu$ m. **(B)** Characterization of JAM-A KO MDCKII cells. Left: Western blot analysis of JAM-A in MDCKII cells with a CrisprCas9-mediated inactivation of the JAM-A gene. Right: IF analysis of JAM-A KO MDCKII cells. Cells were stained for JAM-A, ZO-1 and F-Actin as indicated. Scale bars: 10  $\mu$ m. **(C)** Characterization of JAM-A KO MDCKII cells reconstituted with expression vectors encoding murine JAM-A constructs (mJAM-A/WT, mJAM-A/Y281F, mJAM-A/S285A) under a doxycycline-regulated promoter (pInducer21, Tet-ON). Top: Western blot analysis of JAM-A constructs in the absence and presence of doxycycline (-Dox, +Dox, respectively). Bottom: IF analysis of JAM-A KO MDCKII cells after doxycycline-induced expression of murine JAM-A constructs. Cells were stained for mouse JAM-A, ZO-1 and F-Actin as indicated. Note that the ectopic JAM-A constructs localize to cell-cell contacts at comparable levels. Scale bars: 10  $\mu$ m. **(D)** Knockdown efficiency of  $\alpha$ 3 integrin. Western blot analysis of the  $\alpha$ 3 integrin chain in LA-EGFP-expressing MDCKII cells after transient transfection with a control siRNA pool (ctrl) or a canine  $\alpha$ 3 integrin-specific siRNA pool ( $\alpha$ 3 ITGN). **(E)** Knockdown efficiencies of CD151 and CD9. Quantitative RT-PCR analysis of CD151 (left) and CD9 (right) in LA-EGFP-expressing MDCKII cells after transient transfection with a control siRNA pool (ctrl KD) or canine CD151-specific siRNA pool (CD151 KD) or canine CD9-specific siRNA pool (CD9 KD). Data are presented as mean values  $\pm$  SD (n = 3 independent experiments).

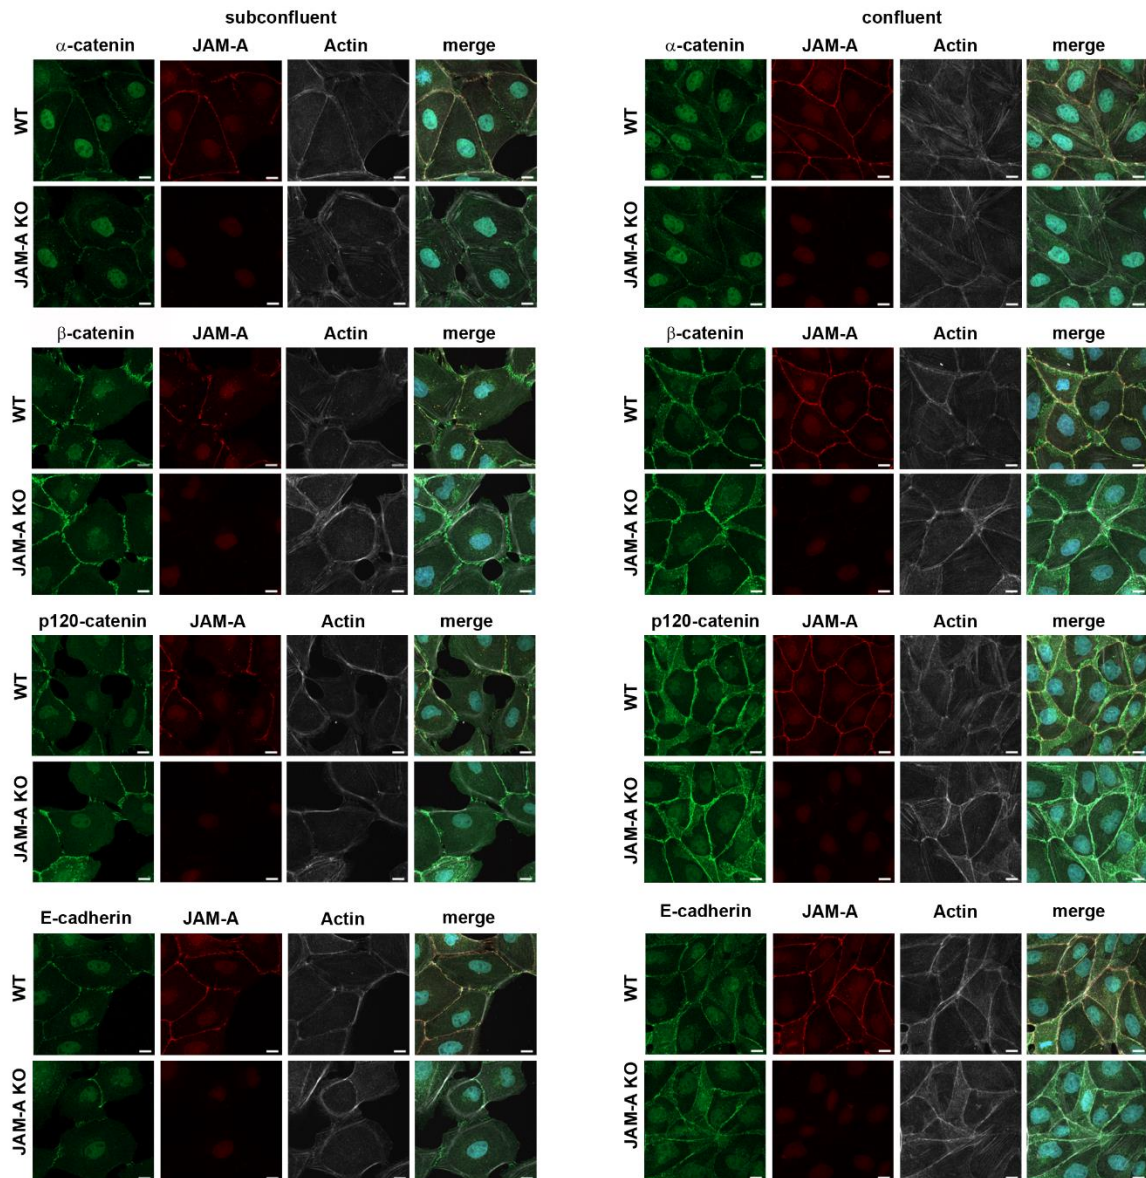

**Suppl. Fig. S2: Characterization of adherens junctions proteins in JAM-A KO MDCKII cells reconstituted with mJAM-A constructs.** MDCKII wildtype cells (WT) and JAM-A knockout MDCKII cells (JAM-A KO) were cultured at subconfluent conditions and confluent conditions, then fixed and stained with antibodies against  $\alpha$ -catenin,  $\beta$ -catenin, p120-catenin, or E-cadherin as indicated. Note that all AJ proteins are normally localized at cell-cell contacts of JAM-A KO MDCKII cells. Scale bars: 10  $\mu$ m.

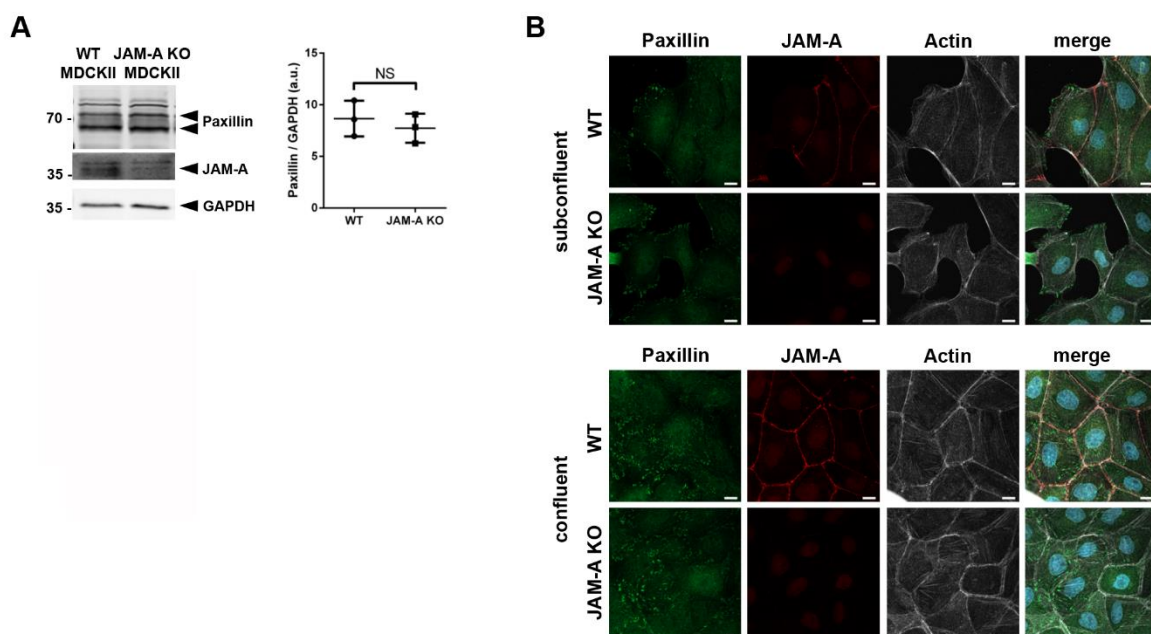

**Suppl. Fig. S3: Characterization of paxillin expression and localization in JAM-A KO MDCKII cells.** (A) Left: Western blot analysis of paxillin expression in JAM-A KO MDCKII cells. Right: Quantitative analysis of paxillin protein levels. Data are presented as mean values  $\pm$  SD ( $n = 3$  independent experiments). (B) IF analysis of paxillin-positive focal adhesions in JAM-A KO MDCKII cells cultured at subconfluent conditions and confluent conditions as indicated. Scale bars: 10  $\mu$ m. Note that paxillin protein levels as well as paxillin-positive focal adhesions are unchanged in JAM-A KO cells.

## Supplementary Movie Legends

**Suppl. Movie 1** (SupplMovie1\_single\_cell\_migration\_ctrl.avi): **Single cell migration of a ctrl MDCKII cell.** Confocal laser scanning microscopy time-lapse movie of a LA-mCherry expressing MDCKII cell without induction of JAM-A shRNA expression (-Dox, ctrl). Z-stacks were taken every 10 minutes over a time-period of 10 h. Left: original video, right: analysis using the Trackmate plugin of ImageJ.

**Suppl. Movie 2** (SupplMovie2\_single\_cell\_migration\_JAM-A\_KD.avi): **Single cell migration of a JAM-A KD MDCKII cell.** Confocal laser scanning microscopy time-lapse movie of a LA-

EGFP expressing MDCKII cell with induction of JAM-A shRNA expression (+Dox, JAM-A KD). Z-stacks were taken every 10 minutes over a time-period of 10 h. Left: original video, right: analysis using the Trackmate plugin of ImageJ.

**Suppl. Movie 3** (SupplMovie3\_cryptic\_lamellipodia\_ctrl.avi): **Cryptic lamellipodia in ctrl MDCKII cells.** Confocal laser scanning microscopy time-lapse movie of mixed LA-EGFP and LA-mCherry expressing MDCKII cells without induction of JAM-A shRNA expression (-Dox, ctrl). Z-stacks were taken every 3 minutes over a time-period of 10 h. Left: original video with overlapping areas highlighted in yellow, right: analysis of overlapping areas by ImageJ.

**Suppl. Movie 4** (SupplMovie4\_cryptic\_lamellipodia\_JAM-A\_KD.avi): **Cryptic lamellipodia in JAM-A KD MDCKII cells.** Confocal laser scanning microscopy time-lapse movie of mixed LA-EGFP and LA-mCherry expressing MDCKII cells with induction of JAM-A shRNA expression (+Dox, JAM-A KD). Z-stacks were taken every 3 minutes over a time-period of 10 h. Left: original video with overlapping areas highlighted in yellow, right: analysis of overlapping areas by ImageJ.

**Suppl. Movie 5** (SupplMovie5\_cryptic\_lamellipodia\_ctrl.avi): **Dynamic of cryptic lamellipodia in collectively migrating ctrl MDCKII cells.** Confocal laser scanning microscopy time-lapse movie of mixed LA-EGFP and LA-mCherry expressing MDCKII cells without induction of JAM-A shRNA expression (-Dox, ctrl). Z-stacks were taken every 3 minutes over a time-period of 10 h. Left: original video with overlapping areas highlighted in yellow, right: analysis of the dynamic of overlapping areas by ImageJ (increase in area shown in white, decrease in black).

**Suppl. Movie 6** (SupplMovie6\_cryptic\_lamellipodia\_JAM-A\_KD.avi): **Dynamic of cryptic lamellipodia in collectively migrating JAM-A KD MDCKII cells.** Confocal laser scanning microscopy time-lapse movie of mixed LA-EGFP and LA-mCherry expressing MDCKII cells

with induction of JAM-A shRNA expression (+Dox, JAM-A KD). Z-stacks were taken every 3 minutes over a time-period of 10 h. Left: original video with overlapping areas highlighted in yellow, right: analysis of the dynamic of overlapping areas by ImageJ (increase in area shown in white, decrease in black).

**Suppl. Movie 7** (SupplMovie7\_single\_cell\_in\_collective\_ctrl.avi): **Migration behavior of single cells embedded in a cell collective (-Dox).** Confocal laser scanning microscopy time-lapse movie of mixed LA-EGFP and LA-mCherry expressing MDCKII cells without induction of JAM-A shRNA expression (-Dox, ctrl). Z-stacks were taken every 3 minutes over a time-period of 10 h. Left: original video, right: binary video of the single LA-mCherry expressing cell which were used to determine Jaccard indices, migration velocities and directionalities.

**Suppl. Movie 8** (SupplMovie8\_single\_cell\_in\_collective\_JAM-A\_KD.avi): **Migration behavior of single cells embedded in a cell collective (+Dox).** Confocal laser scanning microscopy time-lapse movie of mixed LA-EGFP and LA-mCherry expressing MDCKII cells with induction of JAM-A shRNA expression (+Dox, JAM-A KD). Z-stacks were taken every 3 minutes over a time-period of 10 h. Left: original video, right: binary video of the single LA-mCherry expressing cell which were used to determine Jaccard indices, migration velocities and directionalities.
